# Supplementary material for: Brushite mineralised Scots pine (Pinus sylvestris L.) sapwood – revealing mineral crystallization within a wood matrix by in situ XRD
Source: Royal Society of Chemistry journal article supplement (doi:10.1039/d3ra00305a), 2023-01-01
Supplement: d3ra00305a2.pdf [file d3ra00305a2.pdf]

**Electronic supplementary info:**

**Brushite mineralised Scots pine (*Pinus Sylvestris* L.) sapwood – revealing mineral crystallization within wood matrix by *in-situ* XRD**

Edita Garskaite<sup>1\*</sup>, Giedrius Balciunas<sup>2</sup>, Marian Drienovsky<sup>3</sup>, Denis Sokol<sup>4</sup>, Dick Sandberg<sup>1</sup>,  
Alexandre C. Bastos<sup>5</sup>, Andrei N. Salak<sup>5</sup>

<sup>1</sup> *Wood Science and Engineering, Department of Engineering Sciences and Mathematics, Luleå University of Technology, Forskargatan 1, SE-931 87 Skellefteå, Sweden*

<sup>2</sup> *Laboratory of Thermal Insulating Materials and Acoustics, Institute of Building Materials, Vilnius Gediminas Technical University, Linkmenu g. 28, Vilnius LT-08217, Lithuania*

<sup>3</sup> *Institute of Materials Science, Faculty of Materials Science and Technology in Trnava, Slovak University of Technology in Bratislava, Ulica Jana Bottu 2781/25, 91724 Trnava, Slovakia*

<sup>4</sup> *Institute of Chemistry, Faculty of Chemistry and Geosciences, Vilnius University, Naugarduko 24, Vilnius LT-03225, Lithuania*

<sup>5</sup> *Department of Materials and Ceramics Engineering and CICECO – Aveiro Institute of Materials, University of Aveiro, 3810-193 Aveiro, Portugal*

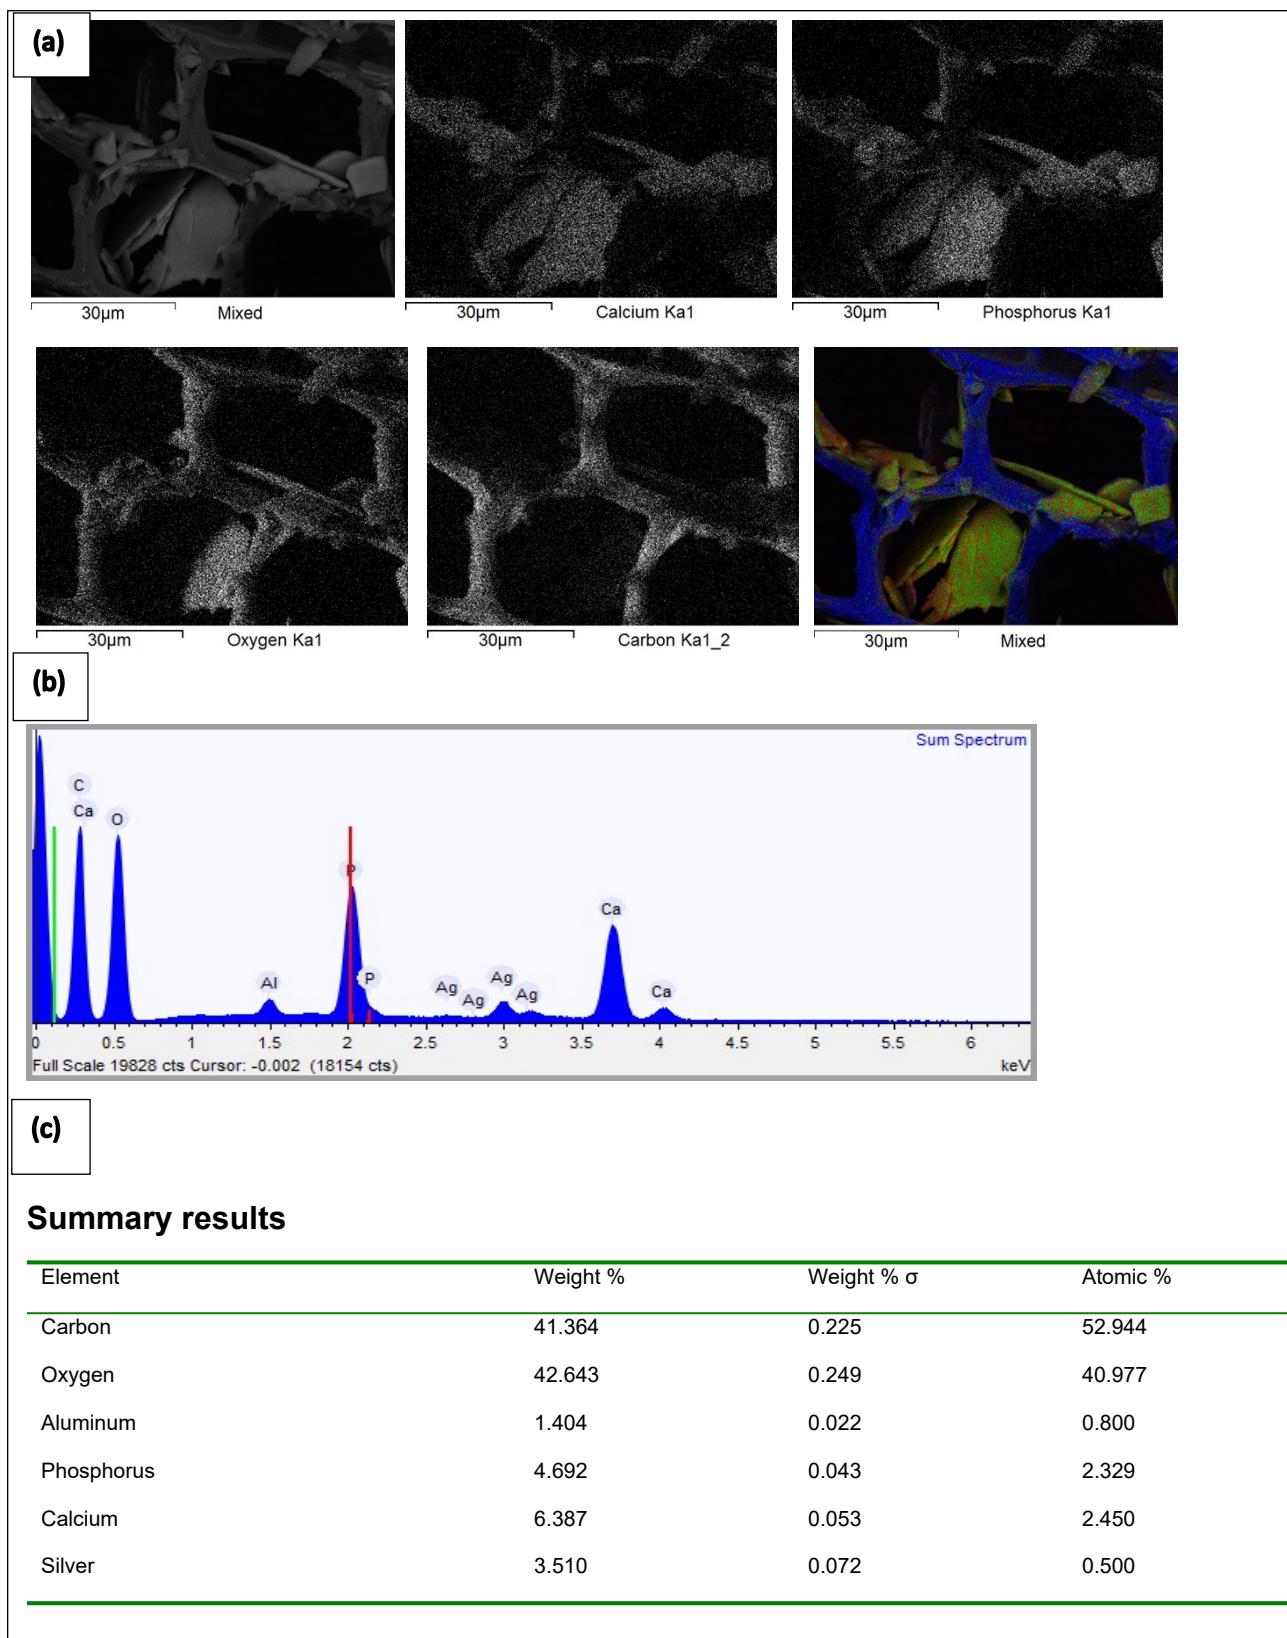

**Fig. S1.** Representative SEM/EDS analysis data of the DCPD(1)-wood stab after the leaching: (a) EDS mapping images showing distribution of the individual Ca, P, O, C elements and of multiple elements (RGB colours assigned as Ca- red, P – green and C – blue), (b) sum EDS spectrum, and (c) summary of results of EDS analysis.

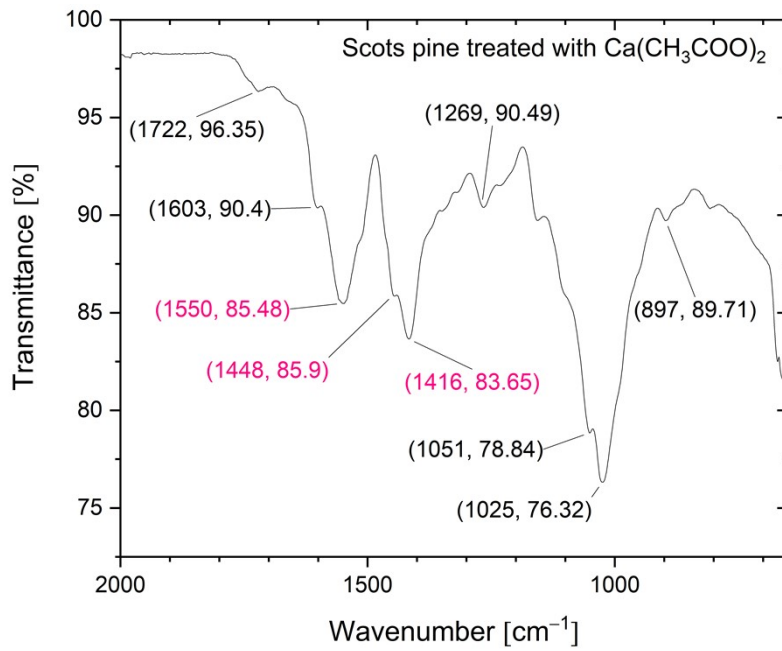

**Fig S2.** FTIR spectrum of the Scots pine sapwood sample treated with solution of 0.5 M  $\text{Ca}(\text{CH}_3\text{COO})_2$ .

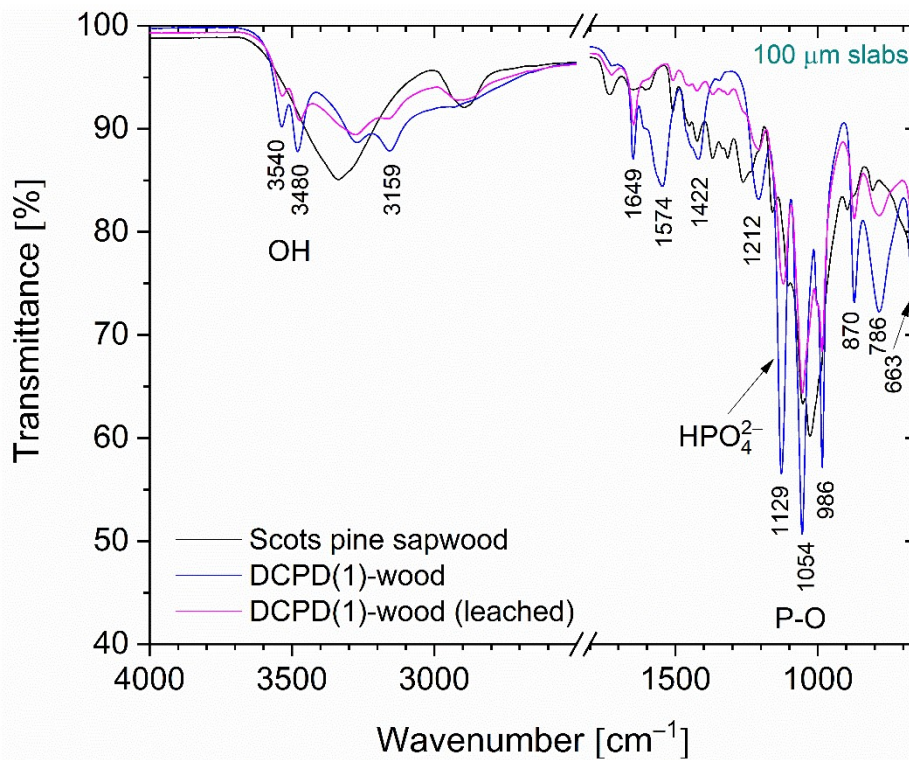

**Fig. S3.** FTIR spectra of the untreated wood and mineralised wood (100  $\mu\text{m}$ ) slabs from the solutions of 0.5 M  $\text{Ca}(\text{CH}_3\text{COO})_2$  and 0.3 M  $\text{NH}_4\text{H}_2\text{PO}_4$  before and after the “leaching”.

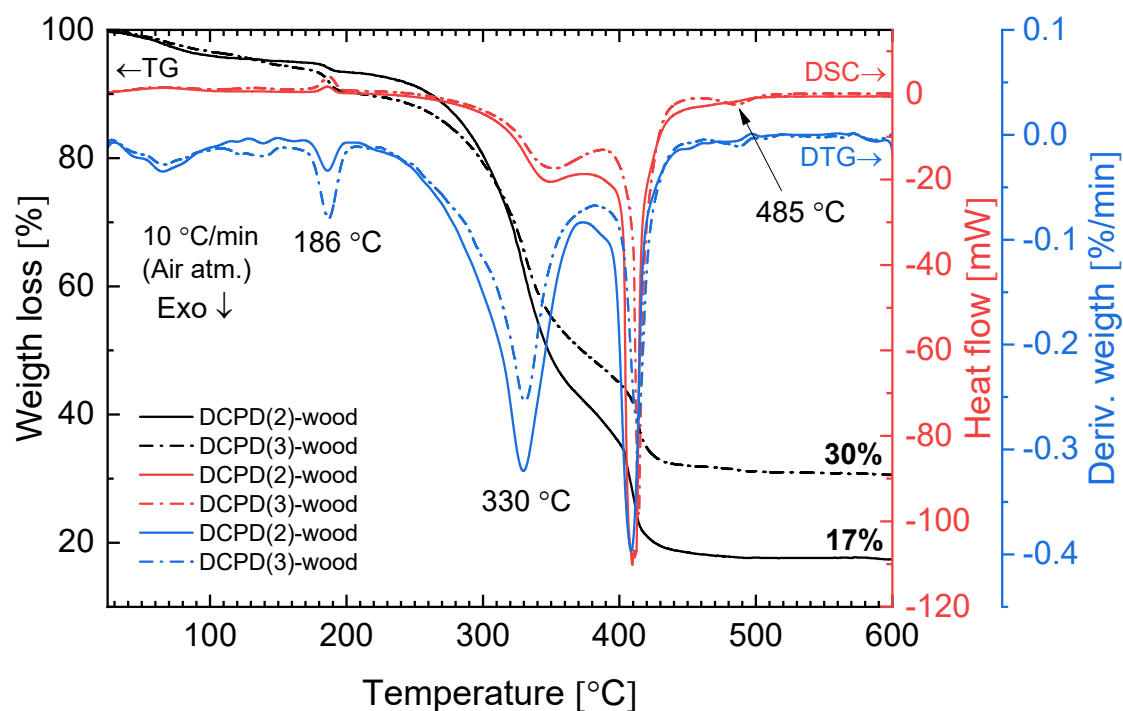

**Fig. S4.** TG/DSC and DTG curves of DCPD(2)-wood and DCPD(3)-wood composites.

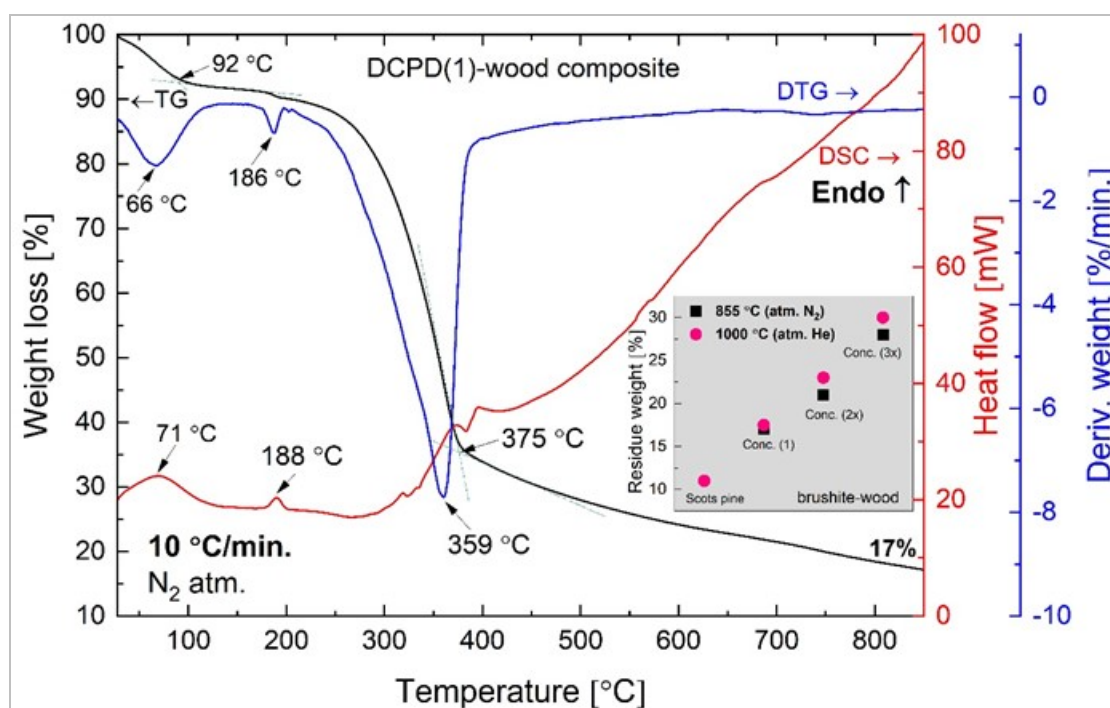

**Fig. S5.** TG/DTG and DSC curves of the DCDP(1)-wood composite (inset shows residue weight % for the samples after burn when TG analysis was performed in either N<sub>2</sub> atmosphere (10°C/min) or He atmosphere (5°C/min)).

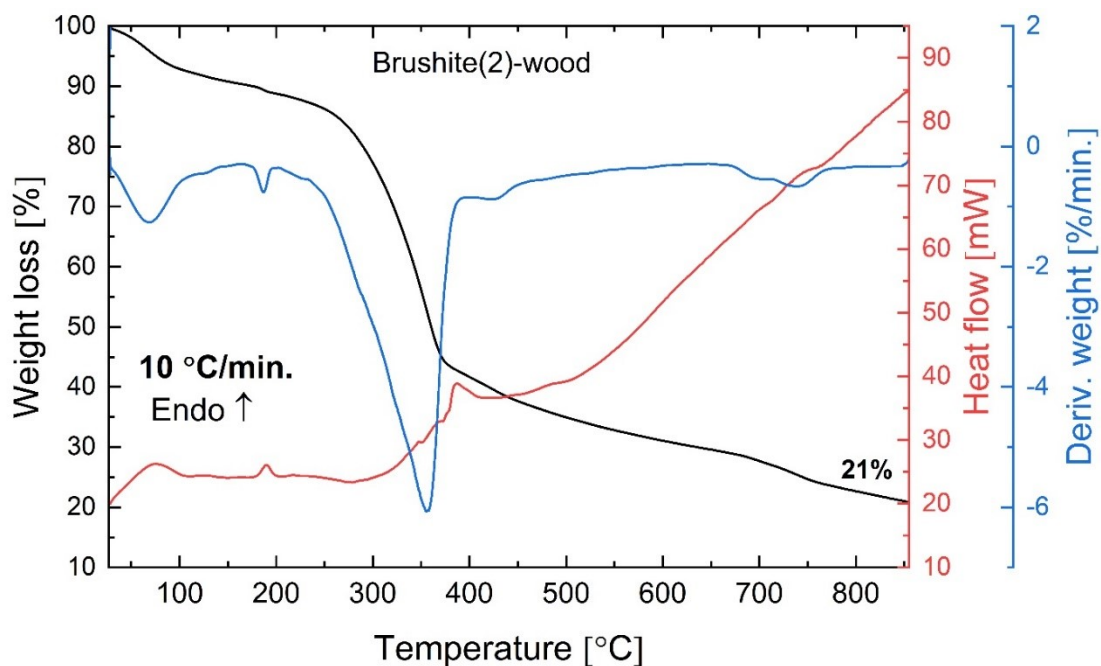

**Fig. S6.** TG/DTG and DSC curves of the DCDP(2)-mineralised wood (specimen taken from the middle of the block of  $(1 \times 1 \times 1)$  cm<sup>3</sup> size).

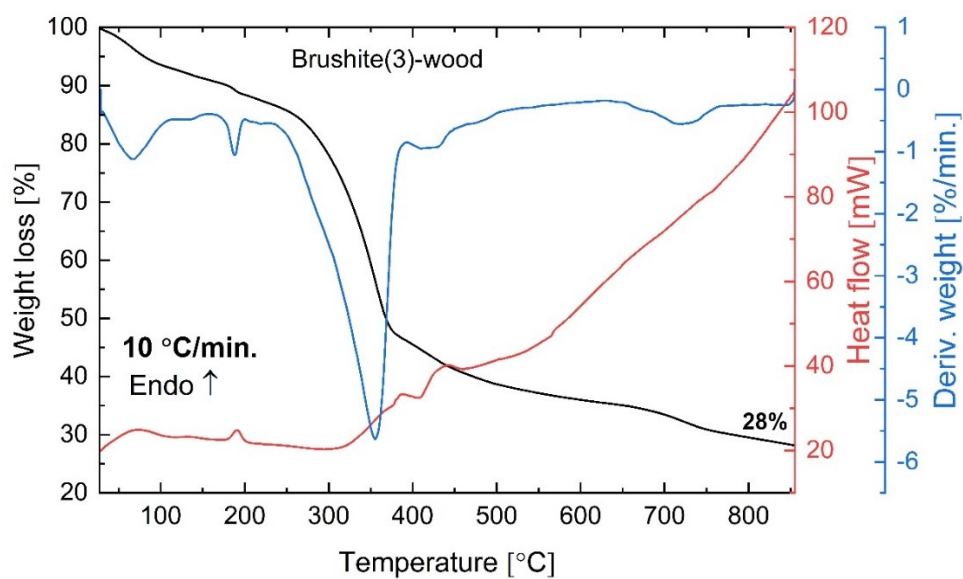

**Fig. S7.** TG/DTG and DSC curves of the DCDP(3)-mineralised wood (specimen taken from the middle of the block of  $1 \times 1 \times 1$  cm size).



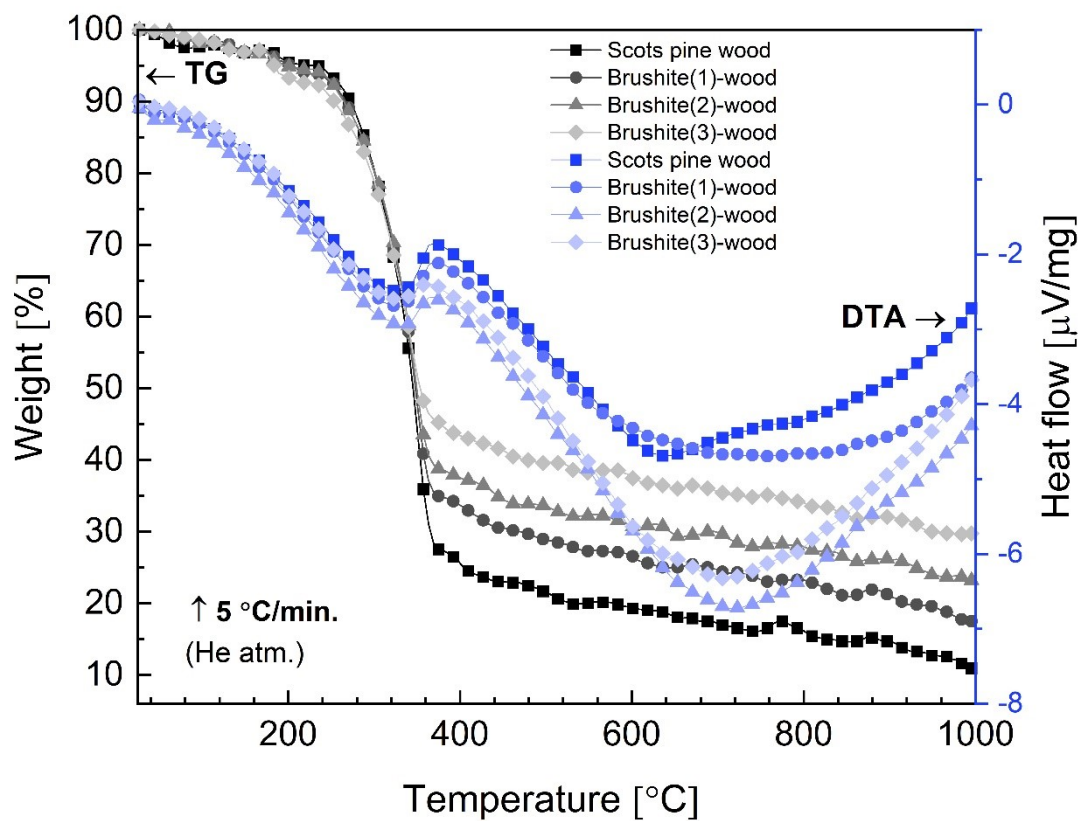

**Fig. S8.** TG and DTA of the brushite-mineralised Scots pine sapwood (He atm., flow rate 55 mL min<sup>-1</sup>, Exo=down).
